# Supplementary material
Source: publisher figshare collection journal article supplement (https://rs.figshare.com/ndownloader/files/15502022)
Supplement: Supplementary file 1 [file 15502022]

Male_ID	River	Predation	Body_size	Orange	Black	Iridescent	VAP	Sperm_head_length	Midpiece_length	Flagellum_length
1D1	Aripo	High	64.615	1.557	2.075	9.287	111.8625	4.3855	3.066	47.22
1D2	Aripo	High	76.165	6.105	0.633	12.319	NA	4.179	2.8525	47.569
1D3	Aripo	High	61.119	3.069	1.025	6.129	118.75	4.2835	2.7745	48.424
1D4	Aripo	High	61.071	2.762	0.68	6.059	53.425	4.308	3.205	47.7225
1D5	Aripo	High	59.245	6.53	1.703	9.468	NA	4.3655	2.8445	47.994
1D6	Aripo	High	56.187	4.117	0.45	7.416	53.95	NA	NA	NA
1D7	Aripo	High	83.444	2.898	0.983	15.584	80.51	4.1995	3.178	46.717
1D8	Aripo	High	61.507	4.044	0.121	8.028	71.23333333	4.1965	2.721	47.202
1D9	Aripo	High	62.381	2.913	1.741	5.664	104.6428571	4.3715	3.1405	47.373
1D10	Aripo	High	76.6	5.454	1.036	9.055	100.2	NA	NA	NA
1D11	Aripo	High	72.696	2.759	0.717	4.364	53.225	NA	NA	NA
1D12	Aripo	High	73.902	2.854	1.395	7.312	118.51	NA	NA	NA
1D13	Aripo	High	56.503	3.966	0.375	6.5	73.01666667	NA	NA	NA
1D14	Aripo	High	45.454	2.167	0	4.677	123.4857143	NA	NA	NA
1D15	Aripo	High	66.674	10.921	1.348	10.437	96.44	4.1645	3.376	47.2725
1D16	Aripo	High	64.14	7.928	1.276	9.173	64.9	NA	NA	NA
1D17	Aripo	High	59.125	1.46	1.237	6.765	119.2	4.3915	3.1555	46.33
1D18	Aripo	High	60.105	5.067	0.487	7.674	50.225	4.402	2.8625	47.606
1D19	Aripo	High	64.83	6.985	0.791	7.491	91.85	4.3585	2.8325	47.2585
1D20	Aripo	High	54.637	1.289	0.938	9.585	70.03333333	4.2985	2.965	47.0505
1D21	Aripo	High	59.733	5.263	0.799	6.244	91.11111111	4.3015	2.927	48.018
1D22	Aripo	High	56.078	1.521	2.394	8.948	84.27777778	4.304	3.106	46.903
1D23	Aripo	High	62.09	0.752	0.683	7.649	77.92	4.2535	3.11	48.2405
1D24	Aripo	High	92.381	14.65	1.324	11.029	121.26	4.33	2.4965	47.146
1D25	Aripo	High	69.925	6.146	0.945	12.469	51.1	NA	NA	NA
1D26	Aripo	High	63.739	4.42	0.385	8.541	106.4363636	4.416	3.0835	47.3435
1D27	Aripo	High	61.662	6.818	2.509	8.665	78.94285714	4.111	3.361	47.2985
1D28	Aripo	High	71.463	2.583	1.421	7.835	NA	NA	NA	NA
1D29	Aripo	High	55.146	6.9	1.901	7.143	89.41428571	4.286	2.8595	48.451
1D30	Aripo	High	63.864	2.927	0.474	7.738	120.3833333	NA	NA	NA
1U1	Aripo	Low	77.662	4.907	6.231	6.884	92.15	4.4215	3.061	48.9915
1U2	Aripo	Low	78.542	3.684	3.885	9.222	110.525	NA	NA	NA
1U3	Aripo	Low	98.841	7.311	0.698	11.636	94.7	4.3465	2.8985	47.817
1U4	Aripo	Low	86.377	2.118	1.757	9.521	109.8	NA	NA	NA
1U5	Aripo	Low	86.534	3.102	3.17	13.349	63.03333333	4.2775	3.142	49.144
1U6	Aripo	Low	94.356	4.885	2.338	9.372	101.2714286	NA	NA	NA
1U7	Aripo	Low	93.622	2.414	1.205	10.801	89.84	4.3305	3.0265	49.03
1U8	Aripo	Low	89.927	4.311	2.406	12.962	119.8285714	NA	NA	NA
1U9	Aripo	Low	89.174	4.551	2.26	10.643	113.75	4.3965	3.026	48.849
1U10	Aripo	Low	88.325	7.154	2.273	9.837	123.9777778	4.36	3.322	48.186
1U11	Aripo	Low	70.912	5.063	3.125	14.814	101.4857143	3.521	3.3465	47.347
1U12	Aripo	Low	100.757	9.801	2.549	12.279	114.85	4.3775	2.7475	48.6805
1U13	Aripo	Low	71.992	3.02	1.192	9.963	NA	NA	NA	NA
1U14	Aripo	Low	98.749	2.98	4.819	8.819	97.01666667	4.4315	2.3835	48.57
1U15	Aripo	Low	83.695	11.985	1.412	9.384	95.48	4.3355	3.2615	49.001
1U16	Aripo	Low	103.381	5.918	2.836	13.654	96.32	4.3105	3.256	47.851
1U17	Aripo	Low	96.316	1.743	0.118	15.567	NA	NA	NA	NA
1U18	Aripo	Low	93.423	14.992	4.812	11.519	98.58571429	3.6905	3.7	48.751
1U19	Aripo	Low	96.355	11.186	3.019	19.307	137.92	4.335	3.345	49.0735
1U20	Aripo	Low	82.212	4.534	3.615	8.776	47.88	4.2395	3.297	48.0125
1U21	Aripo	Low	82.7	10.527	2.397	14.355	62.725	4.2335	3.3845	48.545
1U22	Aripo	Low	90.432	5.103	2.227	15.813	70.27142857	NA	NA	NA
1U23	Aripo	Low	77.525	7.237	2.676	10.084	121.84	3.569	3.842	48.5425
1U24	Aripo	Low	111.142	8.267	2.836	10.72	117.32	4.2605	3.4025	48.0295
1U25	Aripo	Low	96.978	13.196	4.55	19.185	130.7333333	NA	NA	NA
1U26	Aripo	Low	94.906	14.557	3.037	12.652	82.81666667	4.2675	3.4915	48.792
1U27	Aripo	Low	97.182	3.112	1.174	16.22	69.975	NA	NA	NA
1U28	Aripo	Low	105.86	6.477	4.77	16.011	120.9428571	NA	NA	NA
1U29	Aripo	Low	118.323	10.453	2.111	13.022	104.375	4.291	3.0345	47.8235
1U30	Aripo	Low	94.878	3.745	0.057	11.067	140.0125	4.196	3.05	47.893
2D1	Tac/Tuna	High	72.439	8.373	2.299	12.364	75.475	4.124	2.846	46.804
2D2	Tac/Tuna	High	66.639	4.02	0.665	4.884	106.06	NA	NA	NA
2D3	Tac/Tuna	High	77.222	5.452	0.202	8.506	67.26	NA	NA	NA
2D4	Tac/Tuna	High	66.037	3.162	1.166	6.995	43.1	NA	NA	NA
2D5	Tac/Tuna	High	69.571	3.851	0.941	10.657	99.27142857	NA	NA	NA
2D6	Tac/Tuna	High	75.236	7.32	1.051	9.766	94.3	NA	NA	NA
2D7	Tac/Tuna	High	69.178	4.138	1.064	7.577	110.4857143	NA	NA	NA
2D8	Tac/Tuna	High	63.961	2.551	1.705	6.035	113.7333333	NA	NA	NA
2D9	Tac/Tuna	High	69.548	1.804	2.672	7.831	86.24	NA	NA	NA
2D10	Tac/Tuna	High	72.697	5.302	0.509	11.946	71.85	4.2405	2.963	47.1
2D11	Tac/Tuna	High	68.69	4.467	1.536	7.417	72.86	NA	NA	NA
2D12	Tac/Tuna	High	71.324	4.738	0	10.959	100.825	NA	NA	NA
2D13	Tac/Tuna	High	70.529	3.528	1.226	8.102	74.46666667	NA	NA	NA
2D14	Tac/Tuna	High	74.598	1.65	1.991	10.613	61.33333333	NA	NA	NA
2D15	Tac/Tuna	High	68.571	7.998	1.477	6.458	108.3	NA	NA	NA
2D16	Tac/Tuna	High	74.065	8.882	1.413	9.591	117.22	4.183	2.755	47.0095
2D17	Tac/Tuna	High	78.162	5.796	1.428	6.55	93.2625	NA	NA	NA
2D18	Tac/Tuna	High	78.194	5.715	0.401	11.978	109.9833333	4.129	2.958	46.1925
2D19	Tac/Tuna	High	76.778	6.276	0.825	10.713	NA	NA	NA	NA
2D20	Tac/Tuna	High	76.939	5.01	0.478	9.989	111.2285714	4.2815	2.7755	46.8175
2D21	Tac/Tuna	High	86.451	7.487	5.869	17.928	85.78571429	4.276	2.6235	46.427
2D22	Tac/Tuna	High	74.605	4.002	0.886	10.976	118.7888889	NA	NA	NA
2D23	Tac/Tuna	High	67.678	5.511	0	8.839	99.48888889	4.118	2.4805	46.9155
2D24	Tac/Tuna	High	74.583	7.885	1.515	10.073	96.54285714	4.176	2.7255	46.436
2D25	Tac/Tuna	High	75.739	5.44	1.646	8.317	NA	NA	NA	NA
2D26	Tac/Tuna	High	61.501	3.334	1.248	4.868	136.0142857	NA	NA	NA
2D27	Tac/Tuna	High	56.72	1.913	1.196	7.07	131.56	4.195	2.6325	46.7225
2D28	Tac/Tuna	High	72.619	3.053	0.039	9.276	116.5625	NA	NA	NA
2D29	Tac/Tuna	High	64.349	4.575	0.634	11.892	96.35	NA	NA	NA
2D30	Tac/Tuna	High	82.879	6.132	0.869	10.593	103.9166667	3.864	3.478	46.6095
2U1	Tac/Tuna	Low	72.899	7.763	0.711	10.187	77.52857143	NA	NA	NA
2U2	Tac/Tuna	Low	58.129	4.725	3.322	5.555	56.75	4.575	2.901	48.2505
2U3	Tac/Tuna	Low	58.2	2.861	1.02	5.472	87.3	4.34	2.953	48.206
2U4	Tac/Tuna	Low	69.492	8.671	0.201	9.219	106.8857143	4.405	2.9625	48.327
2U5	Tac/Tuna	Low	74.259	8.475	0.346	12.356	98.75	NA	NA	NA
2U6	Tac/Tuna	Low	62.914	3.409	4.692	12.175	45.88	NA	NA	NA
2U7	Tac/Tuna	Low	83.558	6.183	4.155	9.365	67.4	4.408	2.837	47.7965
2U8	Tac/Tuna	Low	70.972	7.449	0.668	11.765	100.1571429	NA	NA	NA
2U9	Tac/Tuna	Low	79.482	7.056	1.622	8.619	84.7125	4.3715	2.825	48.6455
2U10	Tac/Tuna	Low	92.843	13.331	0.439	14.235	78.92857143	4.2895	2.4985	48.094
2U11	Tac/Tuna	Low	82.23	9.476	0.635	8.926	71.31428571	4.2245	3.017	48.4
2U12	Tac/Tuna	Low	69.196	5.009	1.062	17.438	NA	NA	NA	NA
2U13	Tac/Tuna	Low	80.543	9.477	0.5	13.166	91.52857143	4.0495	3.1825	48.0785
2U14	Tac/Tuna	Low	76.345	0.514	0.395	8.89	87.8375	NA	NA	NA
2U15	Tac/Tuna	Low	74.869	8.051	0.747	7.546	71.7	4.46	2.4415	47.4685
2U16	Tac/Tuna	Low	61.689	4.481	0.669	8.48	70.8875	4.3405	3.386	47.302
2U17	Tac/Tuna	Low	74.744	9.941	0	15.013	84.3875	NA	NA	NA
2U18	Tac/Tuna	Low	88.935	13.172	1.341	12.992	63.3	4.423	2.5	47.5805
2U19	Tac/Tuna	Low	86.101	4.022	1.528	5.748	81.8875	4.4355	2.6665	47.1725
2U20	Tac/Tuna	Low	78.592	11.208	0.512	10.097	61.7375	NA	NA	NA
2U21	Tac/Tuna	Low	74.236	4.817	0.967	8.597	64.25	NA	NA	NA
2U22	Tac/Tuna	Low	68.507	5.523	0.444	4.907	94.84	NA	NA	NA
2U23	Tac/Tuna	Low	54.482	4.682	0.551	4.935	84.56666667	NA	NA	NA
2U24	Tac/Tuna	Low	84.857	3.331	1.049	7.455	86.4	NA	NA	NA
2U25	Tac/Tuna	Low	95.634	14.163	1.765	12.433	96.7625	4.347	2.7825	48.591
2U26	Tac/Tuna	Low	77.786	11.63	0.878	9.147	94.9	NA	NA	NA
2U27	Tac/Tuna	Low	92.274	13.561	1.015	11.381	79.7	4.427	2.573	48.4005
2U28	Tac/Tuna	Low	69.197	7.264	0.953	7.201	124.1444444	4.2935	2.602	47.293
2U29	Tac/Tuna	Low	78.199	8.132	0.153	10.541	57.6	4.191	2.7555	48.3775
2U30	Tac/Tuna	Low	67.578	8.114	0.34	9.045	70.1	NA	NA	NA
3D1	Caura	High	69.499	3.593	1.409	4.777	67.96	4.086	2.9705	47.721
3D2	Caura	High	69.468	4.585	0.673	14.293	98.18888889	4.066	3.1935	47.525
3D3	Caura	High	74.452	6.123	0.968	8.095	68.8	4.184	3.099	47.6405
3D4	Caura	High	64.723	2.783	0.967	8.074	79.35	4.208	2.818	46.381
3D5	Caura	High	67.454	3.97	1.289	10.155	89.05	4.155	2.9535	47.261
3D6	Caura	High	50.725	8.04	1.325	3.307	114.7833333	4.289	3.2365	47.09
3D7	Caura	High	67.381	4.344	2.258	6.086	85.7	4.1655	2.6785	47.856
3D8	Caura	High	68.288	5.822	1.173	5.641	95.53333333	4.173	2.9565	47.6265
3D9	Caura	High	66.637	3.184	0.782	8.837	83.3625	4.151	2.823	48.0815
3D10	Caura	High	69.067	2.135	1.775	6.094	84.06666667	NA	NA	NA
3D11	Caura	High	79.855	6.201	0.721	11.246	65.08333333	4.3015	2.9205	46.834
3D12	Caura	High	77.138	9.573	1.727	10.298	80.16	NA	NA	NA
3D13	Caura	High	64.43575	3.63175	1.23345	6.351	109.4428571	NA	NA	NA
3D14	Caura	High	66.169	2.148	1.558	7.392	99.48181818	4.218	3.03	47.23
3D15	Caura	High	87.05	4.377	0.621	6.957	76.25	4.159	2.751	47.419
3D16	Caura	High	105.111	7.049	2.412	15.122	81.66666667	4.13	3.0455	47.37
3D17	Caura	High	62.983	2.969	0.073	6.348	113.2	NA	NA	NA
3D18	Caura	High	71.581	3.677	1.976	5.327	111.9428571	4.123	2.605	48.0045
3D19	Caura	High	56.25	4.412	0	6.643	83.275	NA	NA	NA
3D20	Caura	High	76.971	8.787	1.797	4.938	73.72857143	NA	NA	NA
3D21	Caura	High	71.012	3.344	1.4	5.677	125.6833333	4.0475	3.1075	47.143
3D22	Caura	High	70.994	1.171	1.357	11.243	106.0625	NA	NA	NA
3D23	Caura	High	71.423	9.848	2.803	9.379	NA	4.19	2.9045	47.9305
3D24	Caura	High	68.757	7.48	1.6	8.975	95.075	NA	NA	NA
3D25	Caura	High	87.703	5.252	0.535	8.641	91.34	4.289	2.9385	47.8445
3D26	Caura	High	69.159	1.124	1.582	6.726	87.1	4.147	2.8485	47.353
3D27	Caura	High	82.665	4.445	2.454	9.883	93.68333333	NA	NA	NA
3D28	Caura	High	66.298	7.431	1.301	10.803	94.38333333	4.161	3.0455	46.91
3D29	Caura	High	64.493	5.533	0.243	9.723	91.1	4.226	3.1555	48.666
3D30	Caura	High	72.437	3.389	0.986	9.873	98.08333333	NA	NA	NA
3U1	Caura	Low	76.755	7.475	0.962	15.19	58.05	NA	NA	NA
3U2	Caura	Low	80.147	5.178	2.409	13.177	105.3857143	NA	NA	NA
3U3	Caura	Low	71.331	3.172	0.834	4.05	107	NA	NA	NA
3U4	Caura	Low	69.495	5.312	1.333	9.149	NA	NA	NA	NA
3U5	Caura	Low	71.189	1.439	1.196	5.366	87.33333333	4.23	3.151	48.8705
3U6	Caura	Low	85.967	2.543	0.953	10.695	NA	NA	NA	NA
3U7	Caura	Low	70.894	5.061	0.643	10.504	NA	4.055	2.7585	47.406
3U8	Caura	Low	71.474	2.89	1.013	10.378	NA	4.311	2.95	48.2535
3U9	Caura	Low	86.024	10.543	0.776	10.324	NA	NA	NA	NA
3U10	Caura	Low	71.246	9.412	1.64	12.965	71.6	NA	NA	NA
3U11	Caura	Low	66.509	3.946	1.454	8.526	63.8	4.2875	3.024	48.1115
3U12	Caura	Low	64.677	6.802	1.349	8.452	NA	NA	NA	NA
3U13	Caura	Low	68.251	2.233	1.45	9.716	63.91666667	4.2645	2.5715	48.1865
3U14	Caura	Low	88.835	3.496	0.818	13.306	NA	4.073	3.09	47.8405
3U15	Caura	Low	68.559	2.898	1.155	9.868	57.76666667	NA	NA	NA
3U16	Caura	Low	61.569	3.556	0.799	7.25	NA	NA	NA	NA
3U17	Caura	Low	65.037	6.96	0.549	12.81	NA	NA	NA	NA
3U18	Caura	Low	77.429	4.628	1.098	10.336	74.14	4.296	2.878	49.4065
3U19	Caura	Low	83.74	4.596	0.845	7.574	NA	NA	NA	NA
3U20	Caura	Low	67.257	2.069	2.34	8.698	NA	4.3975	2.6905	47.387
3U21	Caura	Low	53.626	3.312	1.203	7.283	NA	NA	NA	NA
3U22	Caura	Low	67.833	2.65	0.944	9.327	NA	NA	NA	NA
3U23	Caura	Low	79.867	9.035	3.019	11.967	NA	NA	NA	NA
3U24	Caura	Low	67.136	2.824	1.883	9.835	89.02857143	4.3745	2.988	47.6585
3U25	Caura	Low	75.961	5.873	1.81	6.938	80.08333333	4.4075	3.071	47.941
3U26	Caura	Low	71.585	4.885	1.627	9.28	NA	NA	NA	NA
3U27	Caura	Low	78.758	7.53	0.589	11.715	NA	4.1765	2.8385	48.6065
3U28	Caura	Low	71.291	1.703	0.146	5.144	NA	4.0735	2.9395	47.2735
3U29	Caura	Low	69.552	6.871	1.791	9.201	71	NA	NA	NA
3U30	Caura	Low	59.696	3.068	1.004	7.857	87.025	NA	NA	NA
4D1	Lopinot	High	82.915	7.227	1.412	12.878	81.01428571	4.27	3.059	46.312
4D2	Lopinot	High	81.372	4.974	0.025	12.946	88.04444444	4.2395	2.932	45.7125
4D3	Lopinot	High	84.31	2.693	1.399	6.627	106.3333333	4.195	3.0185	46.9435
4D4	Lopinot	High	82.773	4.003	2.709	8.789	85.8	4.248	2.982	47.864
4D5	Lopinot	High	71.53	6.775	1.878	8.435	96.9	4.1865	3.2175	46.9595
4D6	Lopinot	High	93.491	5.046	1.647	7.76	98.95	4.225	2.9295	47.2335
4D7	Lopinot	High	77.644	10.184	1.258	9.263	113.85	4.3015	3.116	46.2485
4D8	Lopinot	High	69.851	4.996	0.728	11.319	88.04	NA	NA	NA
4D9	Lopinot	High	68.81	4.756	1.069	13.497	53.56666667	4.3495	3.0055	46.4965
4D10	Lopinot	High	86.259	5.605	2.091	9.875	73.125	4.5545	2.78	47.595
4D11	Lopinot	High	82.961	2.457	1.433	13.473	98.84	4.28	2.8605	46.7965
4D12	Lopinot	High	107.274	4.431	0.68	11.605	72.53333333	4.2235	2.5975	46.9155
4D13	Lopinot	High	76.61351	5.53858	0.649	9.601	90.2125	4.2495	3.2095	46.465
4D14	Lopinot	High	94.049	4.729	1.719	17.426	76.06	4.3855	2.6915	46.377
4D15	Lopinot	High	90.439	2.777	0.842	11.02	99.6	4.2595	2.8215	48.282
4D16	Lopinot	High	90.578	4.568	1.135	12.652	53.4	4.039	3.0855	46.0945
4D17	Lopinot	High	64.579	2.849	0.826	6.579	71.1	4.3335	2.9435	46.598
4D18	Lopinot	High	64.779	6.703	1.041	5.948	88.5	4.2945	2.7755	47.0885
4D19	Lopinot	High	77.509	6.31	0.787	4.469	96.7	4.3705	2.7935	46.3225
4D20	Lopinot	High	77.043	2.572	0.204	10.859	90.14285714	4.3485	2.809	45.7045
4D21	Lopinot	High	75.09	4.577	0.558	10.105	97.86	4.3525	2.877	47.1855
4D22	Lopinot	High	63.557	1.897	1.423	8.681	101.44	4.2015	3.434	46.0905
4D23	Lopinot	High	60.967	1.449	0.931	10.748	92.175	4.3615	3.0735	47.0215
4D24	Lopinot	High	60.548	4.563	0.103	6.958	74.1	4.3315	3.2155	46.6185
4D25	Lopinot	High	63.519	6.419	0.942	7.712	87.68	4.3245	3.0195	46.496
4D26	Lopinot	High	60.586	3.984	0.886	6.529	70.38333333	4.2165	3.0645	46.589
4D27	Lopinot	High	78.337	4.092	0.762	12.41	62.1	4.2055	3.3645	46.821
4D28	Lopinot	High	49.893	4.622	0.688	9.628	59	NA	NA	NA
4D29	Lopinot	High	54.144	2.605	0.724	10.132	NA	4.205	2.9935	46.956
4D30	Lopinot	High	53.6	5.169	2.063	4.479	81.275	4.208	2.9075	46.591
4U1	Lopinot	Low	65.61	3.241	1.325	5.53	81.64285714	4.3985	3.0875	47.0505
4U2	Lopinot	Low	69.221	5.31	0.945	8.245	72.38333333	4.285	2.951	47.011
4U3	Lopinot	Low	88.073	10.321	1.225	10.014	87.61	4.3165	2.973	47.7945
4U4	Lopinot	Low	82.255	8.062	0.788	8.997	66	4.2335	2.866	47.576
4U5	Lopinot	Low	86.269	5.547	0.172	11.379	77.34	4.2825	3.146	46.832
4U6	Lopinot	Low	82.084	6.929	1.295	15.904	94.7	4.3105	3.1065	46.9915
4U7	Lopinot	Low	74.965	12.545	0.813	5.548	95.7875	4.187	2.963	46.6415
4U8	Lopinot	Low	62.443	1.717	0.347	8.499	105.25	4.215	3.0285	46.683
4U9	Lopinot	Low	78.713	6.784	1.285	11.524	81.44	4.289	2.716	46.8895
4U10	Lopinot	Low	72.627	8.094	0.588	7.697	83.75	4.2405	2.9695	46.3715
4U11	Lopinot	Low	74.645	8.125	1.615	8.894	NA	NA	NA	NA
4U12	Lopinot	Low	81.369	2.017	1.697	8.735	104.0125	4.2485	2.982	47.397
4U13	Lopinot	Low	86.56	5.028	0.734	17.169	75.91666667	4.329	3.151	47.1095
4U14	Lopinot	Low	84.83	5.321	1.439	15.641	124.5	4.2695	3.0105	46.6155
4U15	Lopinot	Low	84.296	4.88	0.838	16.36	78.51111111	NA	NA	NA
4U16	Lopinot	Low	71.411	4.062	0.823	6.305	56.55	4.104	3.411	47.1465
4U17	Lopinot	Low	97.708	11.158	1.704	12.74	80.23333333	NA	NA	NA
4U18	Lopinot	Low	89.993	7.057	1.079	15.638	111.02	4.363	2.8075	47.5395
4U19	Lopinot	Low	94.907	8.995	1.092	11.428	54.54	4.21	2.614	47.3785
4U20	Lopinot	Low	94.877	8.954	0.815	16.861	96.97777778	4.246	3.0865	47.401
4U21	Lopinot	Low	85.578	4.074	0.536	11.69	63.3375	4.2335	3.1675	47.482
4U22	Lopinot	Low	94.115	4.56	1.765	12.407	78.68571429	4.1155	3.1475	46.5405
4U23	Lopinot	Low	68.928	4.131	0.644	9.453	73.28333333	NA	NA	NA
4U24	Lopinot	Low	94.376	7.158	0.989	16.236	86.775	4.26	2.795	46.598
4U25	Lopinot	Low	63.494	4.249	0.526	10.217	97.87142857	4.3835	2.8825	46.661
4U26	Lopinot	Low	86.781	9.705	1.791	12.744	125.7666667	4.232	3.0505	47.1915
4U27	Lopinot	Low	87.002	14.745	1.247	11.646	89.04	4.0705	3.4405	46.1885
4U28	Lopinot	Low	104.638	6.617	1.049	15.717	80.36666667	4.348	2.9485	46.8045
4U29	Lopinot	Low	84.791	6.667	0.575	16.223	90.22	4.2	3.0905	47.503
4U30	Lopinot	Low	74.801	2.5	0.926	11.742	69.2	NA	NA	NA
5D1	Quare	High	53.312	5.491	1.176	7.177	88.5625	NA	NA	NA
5D2	Quare	High	61.84	1.732	0.89	5.799	78	4.3075	3.661	46.503
5D3	Quare	High	66.062	4.25	0.114	10.568	110.975	NA	NA	NA
5D4	Quare	High	56.543	5.258	1.184	6.595	99.23333333	NA	NA	NA
5D5	Quare	High	59.545	3.131	0.897	8.758	63.4625	4.352	3.0425	46.608
5D6	Quare	High	75.85	8.876	1.63	7.142	120.46	NA	NA	NA
5D7	Quare	High	75.812	2.896	0.478	9.533	86.65	4.193	2.5695	47.9765
5D8	Quare	High	59.53	5.375	0.444	8.723	94.72	NA	NA	NA
5D9	Quare	High	58.717	2.531	0.903	5.952	103.4	4.297	3.324	48.2965
5D10	Quare	High	57.727	2.888	1.543	9.848	67.85	NA	NA	NA
5D11	Quare	High	51.508	8.213	0.928	6.828	109.9857143	NA	NA	NA
5D12	Quare	High	65.084	6.987	1.494	4.311	79.56666667	4.3105	2.58	47.859
5D13	Quare	High	58.345	5.806	0.471	6.872	76.5625	4.2545	3.0775	47.179
5D14	Quare	High	51.834	3.923	0.795	2.827	94.98333333	NA	NA	NA
5D15	Quare	High	61.336	3.443	0.974	4.973	120.2428571	NA	NA	NA
5D16	Quare	High	51.588	1.798	0.966	6.482	105.9333333	NA	NA	NA
5D17	Quare	High	56.723	4.256	0.909	7.11	77.53333333	NA	NA	NA
5D18	Quare	High	61.548	1.063	1.403	9.963	98.58571429	NA	NA	NA
5D19	Quare	High	56.159	4.167	0.918	6.212	102.74	NA	NA	NA
5D20	Quare	High	60.954	4.685	1.585	6.023	90.32	NA	NA	NA
5D21	Quare	High	50.289	2.231	1.522	4.034	92.17142857	NA	NA	NA
5D22	Quare	High	50.501	1.261	0.748	5.063	85.8	NA	NA	NA
5D23	Quare	High	62.387	2.276	0.304	7.501	109.34	NA	NA	NA
5D24	Quare	High	56.971	4.146	1.251	6.966	125.36	NA	NA	NA
5D25	Quare	High	51.161	3.585	0.738	5.146	87.5	NA	NA	NA
5D26	Quare	High	55.045	3.057	1.317	5.823	63.32	4.3425	2.827	47.637
5D27	Quare	High	42.587	2.89	0.685	4.91	90	NA	NA	NA
5D28	Quare	High	52.043	2.233	0.253	2.144	80.68333333	4.3605	2.9595	46.401
5D29	Quare	High	52.079	1.631	0.101	4.274	84.525	NA	NA	NA
5D30	Quare	High	47.005	1.658	0.618	1.676	88.7	NA	NA	NA
5U1	Quare	Low	95.243	9.784	2.109	17.31	112.5	4.246	2.632	46.901
5U2	Quare	Low	114.318	13.171	1.375	14.665	111.95	4.1905	2.441	47.4975
5U3	Quare	Low	113.665	14.926	0.448	19.275	109.525	NA	NA	NA
5U4	Quare	Low	66.681	14.464	3.529	5.668	117.9571429	4.361	3.0135	48.7025
5U5	Quare	Low	58.984	2.23	1.489	4.969	87.26	4.36	3.129	46.832
5U6	Quare	Low	75.59	11.405	1.742	9.655	83.78571429	NA	NA	NA
5U7	Quare	Low	91.886	6.19	1.945	9.786	104.1833333	NA	NA	NA
5U8	Quare	Low	79.679	10.587	3.338	10.156	125.28	4.3195	2.753	48.0945
5U9	Quare	Low	71.286	0.732	2.537	8.073	72.075	NA	NA	NA
5U10	Quare	Low	93.997	11.023	1.06	12.757	102.2	4.2755	2.4735	48.301
5U11	Quare	Low	61.083	3.022	0.988	4.93	100.6571429	NA	NA	NA
5U12	Quare	Low	91.786	10.033	1.088	10.872	144.0571429	4.413	2.787	47.9115
5U13	Quare	Low	64.491	7.895	2.462	4.836	106.7166667	NA	NA	NA
5U14	Quare	Low	78.626	8.402	1.923	8.766	130.25	NA	NA	NA
5U15	Quare	Low	49.039	3.326	1.887	4.108	96.14285714	NA	NA	NA
5U16	Quare	Low	77.438	7.181	1.974	8.045	102.0833333	NA	NA	NA
5U17	Quare	Low	72.098	4.028	0.811	7.179	98.92	4.3875	3.143	49.06
5U18	Quare	Low	48.71	2.87	1.247	4.561	61.31666667	NA	NA	NA
5U19	Quare	Low	68.044	6.501	1.188	7.68	74.8	NA	NA	NA
5U20	Quare	Low	70.502	3.74	0.352	7.82	97.5875	4.2925	2.625	48.33
5U21	Quare	Low	50.169	1.968	0.551	7.913	102.25	NA	NA	NA
5U22	Quare	Low	97.94	6.709	1.905	12.536	89.32	NA	NA	NA
5U23	Quare	Low	56.957	5.002	0.791	5.98	105.7333333	NA	NA	NA
5U24	Quare	Low	90.944	1.688	0.075	13.629	90.55	4.388	2.8565	48.5615
5U25	Quare	Low	75.048	1.412	0.54	7.411	116.4	4.2695	2.7145	47.234
5U26	Quare	Low	75.485	8.992	0.552	11.15	104.8333333	NA	NA	NA
5U27	Quare	Low	65.634	8.939	1.073	6.514	108.375	NA	NA	NA
5U28	Quare	Low	71.682	7.125	1.473	8.625	123.9888889	NA	NA	NA
5U29	Quare	Low	57.979	7.336	1.033	4.605	144.1166667	NA	NA	NA
5U30	Quare	Low	73.341	6.902	0.66	9.327	148.4333333	NA	NA	NA
6D1	Guanapo	High	71.082	2.568	0.538	8.647	81.88	NA	NA	NA
6D2	Guanapo	High	57.695	3.097	1.234	7.247	56.6	4.219	2.941	47.3285
6D3	Guanapo	High	59.151	5.136	1.326	5.564	68	NA	NA	NA
6D4	Guanapo	High	51.835	5.112	0.865	6.765	95.57142857	NA	NA	NA
6D5	Guanapo	High	59.452	3.83	0.858	6.491	83.17142857	NA	NA	NA
6D6	Guanapo	High	64.132	5.637	0.57	7.75	75.3	NA	NA	NA
6D7	Guanapo	High	59.52	2.073	0.385	10.381	114.3666667	4.206	2.78	47.103
6D8	Guanapo	High	57.495	1.472	1.655	5.95	117.5142857	NA	NA	NA
6D9	Guanapo	High	57.886	3.034	0.404	8.712	70.9875	NA	NA	NA
6D10	Guanapo	High	58.993	2.639	0.795	4.922	118.075	NA	NA	NA
6D11	Guanapo	High	57.144	3.56	2.743	6.832	95.9	NA	NA	NA
6D12	Guanapo	High	65.151	2.855	1.215	8.931	80.63333333	4.3795	2.8835	47.0135
6D13	Guanapo	High	70.327	3.997	1.382	7.95	82.325	4.29	3.0915	46.9135
6D14	Guanapo	High	68.79	2.804	0.622	7.02	86.01666667	NA	NA	NA
6D15	Guanapo	High	65.909	3.366	1.394	10.32	108.6833333	NA	NA	NA
6D16	Guanapo	High	67.607	3.898	0.652	9.156	71	NA	NA	NA
6D17	Guanapo	High	65.191	6.746	1.456	7.889	100.0571429	NA	NA	NA
6D18	Guanapo	High	51.545	6.157	0.362	6.718	99.47142857	NA	NA	NA
6D19	Guanapo	High	74.94	3.856	0.448	6.481	88.25	NA	NA	NA
6D20	Guanapo	High	63.909	4.791	0.492	7.222	95	NA	NA	NA
6D21	Guanapo	High	58.43	2.882	0.624	9.023	76.71666667	4.4475	3.033	47.29
6D22	Guanapo	High	63.418	2.962	0.452	7.2497121	NA	4.17	2.8	46.2975
6D23	Guanapo	High	43.297	1.982	0.563	6.249	88.025	NA	NA	NA
6D24	Guanapo	High	53.663	3.205	0.213	11.611	105.325	NA	NA	NA
6D25	Guanapo	High	61.363	3.283	0.555	10.721	98.3	4.4405	2.518	48.015
6D26	Guanapo	High	57.942	3.591	1.364	10.336	103.95	4.2445	3.0605	47.578
6D27	Guanapo	High	61.641	2.68	0.674	6.127	87.9625	4.2745	2.8365	47.341
6D28	Guanapo	High	62.51	5.127	0.672	8.132	79.06	NA	NA	NA
6D29	Guanapo	High	51.104	3.131	1.124	5.305	76.14444444	NA	NA	NA
6D30	Guanapo	High	53.001	1.599	1.552	6.025	73.95	NA	NA	NA
6U1	Guanapo	Low	79.661	7.031	0	8.96	106.375	NA	NA	NA
6U2	Guanapo	Low	63.546	3.002	0.704	9.394	86.4125	4.188	3.205	48.0405
6U3	Guanapo	Low	79.268	2.574	0.678	9.123	87.14285714	4.4045	3.652	48.825
6U4	Guanapo	Low	80.693	2.754	0.453	8.019	NA	4.457	3.3135	48.828
6U5	Guanapo	Low	106.499	15.256	0.921	16.735	93.5875	4.4055	3.086	47.525
6U6	Guanapo	Low	73.549	2.988	0.635	4.744	77.58888889	4.381	3.08	50.2465
6U7	Guanapo	Low	74.98	3.124	1.298	5.764	NA	NA	NA	NA
6U8	Guanapo	Low	69.64	2.816	1.16	6.513	77.28333333	NA	NA	NA
6U9	Guanapo	Low	102.116	11.832	0.6	13.958	93.11428571	4.42	2.606	49.5
6U10	Guanapo	Low	89.839	8.55	0.62	14.482	NA	NA	NA	NA
6U11	Guanapo	Low	103.616	5.336	1.501	14.122	110.3166667	4.2	2.7325	47.2855
6U12	Guanapo	Low	96.522	3.768	1.041	12.292	94.77142857	NA	NA	NA
6U13	Guanapo	Low	77.706	1.479	0.554	12.891	62.46	NA	NA	NA
6U14	Guanapo	Low	79.944	1.462	1.189	8.688	85.54	4.3235	3.2575	48.01
6U15	Guanapo	Low	87.518	3.899	1.693	13.958	107.6166667	4.513	2.939	48.067
6U16	Guanapo	Low	89.589	3.253	0.71	10.858	94.74444444	NA	NA	NA
6U17	Guanapo	Low	100.693	7.877	0	9.936	85.3	NA	NA	NA
6U18	Guanapo	Low	94.707	6.523	0.517	13.371	66.53333333	NA	NA	NA
6U19	Guanapo	Low	84.209	8.844	0.734	12.777	65.44	NA	NA	NA
6U20	Guanapo	Low	100.192	4.219	0.339	11.811	NA	NA	NA	NA
6U21	Guanapo	Low	87.466	5.328	1.045	11.899	77.76666667	NA	NA	NA
6U22	Guanapo	Low	74.137	4.166	0.969	10.939	125.375	NA	NA	NA
6U23	Guanapo	Low	78.06	2.186	1.449	8.559	68.7	NA	NA	NA
6U24	Guanapo	Low	84.491	5.389	2.625	10.38	NA	NA	NA	NA
6U25	Guanapo	Low	89.364	6.477	0.595	18.75	104.0833333	NA	NA	NA
6U26	Guanapo	Low	93.217	3.067	2.264	10.153	73.3	NA	NA	NA
6U27	Guanapo	Low	70.091	3.544	0.23	9.33	99.4	NA	NA	NA
6U28	Guanapo	Low	74.07	15.802	0.227	8.574	86.66666667	NA	NA	NA
6U29	Guanapo	Low	93.78	2.486	0.606	15.326	88.08571429	NA	NA	NA
6U30	Guanapo	Low	79.816	5.93	1.495	11.104	77.9375	NA	NA	NA
8D1	Yarra	High	53.272	6.184	0.734	5.055	NA	NA	NA	NA
8D2	Yarra	High	45.295	4.998	0.816	8.173	109.3	4.4655	3.0105	48.9
8D3	Yarra	High	59.783	4.591	0.959	7.666	NA	NA	NA	NA
8D4	Yarra	High	55.809	8.736	0.857	5.928	77.1	NA	NA	NA
8D5	Yarra	High	50.811	8.245	1.072	5.791	99.95	NA	NA	NA
8D6	Yarra	High	47.553	4.513	0.841	3.433	91.23333333	4.4325	2.7365	49.528
8D7	Yarra	High	49.746	4.393	0.521	6.512	88.45	4.471	3.0145	48.289
8D8	Yarra	High	56.497	7.573	1.204	8.027	111.4125	4.432	3.0755	50.478
8D9	Yarra	High	54.874	6.611	0.915	4.439	120.1	NA	NA	NA
8D10	Yarra	High	62.761	4.442	0.934	8.498	118.825	NA	NA	NA
8D11	Yarra	High	44.625	3.756	1.006	4.996	119.36	4.5725	3.001	49.5965
8D12	Yarra	High	55.406	8.529	0.836	6.104	93.375	4.2915	3.057	49.221
8D13	Yarra	High	56.866	5.445	0.584	8.36	97.725	NA	NA	NA
8D14	Yarra	High	54.675	5.315	0.67	5.778	128.7	NA	NA	NA
8D15	Yarra	High	46.093	2.923	0.319	5.194	79.9	NA	NA	NA
8D16	Yarra	High	49.264	5.912	0.569	5.956	NA	NA	NA	NA
8D17	Yarra	High	51.474	4.35	0.437	5.891	139.9666667	NA	NA	NA
8D18	Yarra	High	63.406	4.987	3.476	8.846	123.45	NA	NA	NA
8D19	Yarra	High	47.272	4.313	1.029	6.859	98.26666667	NA	NA	NA
8D20	Yarra	High	50.847	7.61	1.264	6.273	110.075	NA	NA	NA
8D21	Yarra	High	50.29	5.646	0.553	9.147	132.1	NA	NA	NA
8D22	Yarra	High	62.935	4.236	1.669	6.72	85.68333333	NA	NA	NA
8D23	Yarra	High	51.268	5.035	1.042	7.897	139.425	NA	NA	NA
8D24	Yarra	High	53.219	5.065	0.386	6.084	105.15	NA	NA	NA
8D25	Yarra	High	54.306	8.389	0.475	5.655	100.5	4.445	2.4675	48.9665
8D26	Yarra	High	46.699	5.388	0.78	6.135	NA	NA	NA	NA
8D27	Yarra	High	43.911	2.649	0.802	7.121	78.3	NA	NA	NA
8D28	Yarra	High	46.942	6.965	0.737	7.49	103.44	NA	NA	NA
8D29	Yarra	High	45.837	1.47	1.369	3.132	82.86666667	NA	NA	NA
8D30	Yarra	High	47.358	3.753	0.971	5.894	97.81666667	4.472	2.6395	49.1735
8U1	Yarra	Low	105.392	16.987	2.112	12.711	82.25714286	4.4835	2.821	48.3765
8U2	Yarra	Low	87.808	6.577	0.922	11.273	125.06	4.3975	3.2485	50.3065
8U3	Yarra	Low	85.671	7.178	1.645	10.283	99.77142857	4.3775	3.6345	47.979
8U4	Yarra	Low	92.156	10.416	1.716	14.174	86.275	4.4035	2.8275	48.5855
8U5	Yarra	Low	88.113	19.384	1.406	11.479	119.4666667	4.597	2.779	51.221
8U6	Yarra	Low	62.81	4.694	1.512	9.143	134.875	4.4345	3.209	49.5125
8U7	Yarra	Low	77.817	7.198	0.611	8.19	NA	NA	NA	NA
8U8	Yarra	Low	91.733	16.565	0.833	12.539	73.55	4.3165	3.5095	49.1855
8U9	Yarra	Low	71.079	10.686	2.792	8.693	105.0714286	4.447	2.9995	51.0755
8U10	Yarra	Low	77.658	7.928	1.607	10.892	NA	4.495	2.9885	49.6945
8U11	Yarra	Low	67.954	9.48	1.492	11.438	84.86	NA	NA	NA
8U12	Yarra	Low	89.929	16.375	2.074	13.753	NA	4.505	2.8595	49.6435
8U13	Yarra	Low	75.128	13.208	2.503	7.294	70.31666667	4.276	2.995	51.253
8U14	Yarra	Low	79.411	7.175	0.399	10.474	NA	NA	NA	NA
8U15	Yarra	Low	68.274	11.088	2.608	7.134	107.7666667	4.3995	3.666	49.9075
8U16	Yarra	Low	82.581	13.816	0.683	9.049	111.7	4.402	2.9395	50.0075
8U17	Yarra	Low	90.695	11.706	1.54	8.58	118.88	4.322	3.2985	50.6725
8U18	Yarra	Low	73.939	5.911	1.697	12.4	47.4	NA	NA	NA
8U19	Yarra	Low	108.544	18.902	0.192	21.106	85.2	NA	NA	NA
8U20	Yarra	Low	61.49	4.809	1.088	11.024	NA	NA	NA	NA
8U21	Yarra	Low	88.585	20.425	0.671	10.84	145.24	NA	NA	NA
8U22	Yarra	Low	75.19	6.031	0.995	8.054	NA	4.5645	3.089	50.997
8U23	Yarra	Low	84.007	9.839	0.891	6.845	97.53333333	4.5075	3.1925	50.104
8U24	Yarra	Low	87.525	9.228	2.059	12.896	NA	4.3365	3.614	49.16
8U25	Yarra	Low	85.851	5.178	0.199	10.585	86.625	4.345	2.798	49.9825
8U26	Yarra	Low	84.904	11.591	0.656	8.721	101.8833333	NA	NA	NA
8U27	Yarra	Low	49.977	7.858	0.708	6.786	NA	NA	NA	NA
8U28	Yarra	Low	82.508	10.81	0.617	10.756	101.8818182	NA	NA	NA
8U29	Yarra	Low	93.734	10.801	0.808	10.875	NA	4.5945	2.8665	50.84
8U30	Yarra	Low	88.654	17.549	0.655	17.44	128.525	NA	NA	NA
10D1	Turure	High	69.978	1.312	0.298	9.91	76.58	NA	NA	NA
10D2	Turure	High	67.417	1.228	1.587	9.787	116.8	4.565	2.858	48.1435
10D3	Turure	High	59.114	2.162	0.652	7.118	91.5	4.333	3.324	47.033
10D4	Turure	High	60.861	0.933	1.192	7.239	133.16	4.506	3.4205	49.397
10D5	Turure	High	80.376	2.648	1.183	12.704	NA	4.412	3.2205	47.2335
10D6	Turure	High	67.819	1.835	1.134	8.453	109.875	NA	NA	NA
10D7	Turure	High	53.698	0.608	0.524	9.187	133.18	NA	NA	NA
10D8	Turure	High	59.488	1.641	0.902	7.532	109.1333333	4.456	3.353	48.205
10D9	Turure	High	70.523	1.123	1.235	11.68	104.7166667	4.435	3.2535	47.4175
10D10	Turure	High	66.742	2.091	0.398	9.165	143.1	NA	NA	NA
10D11	Turure	High	81.789	1.221	0.535	13.176	129.7	4.4315	2.804	47.5235
10D12	Turure	High	51.156	1.853	0.389	9.553	97.95	NA	NA	NA
10D13	Turure	High	56.705	2.201	0.2	9.037	133.3	NA	NA	NA
10D14	Turure	High	53.286	1.073	0.4	5.478	144.8166667	NA	NA	NA
10D15	Turure	High	63.251	5.151	0	7.717	138.475	NA	NA	NA
10D16	Turure	High	85.799	1.628	0	14.061	105.66	NA	NA	NA
10D17	Turure	High	72.819	2.31	0.912	7.304	96.425	NA	NA	NA
10D18	Turure	High	58.379	2.986	0.81	6.058	87.65	NA	NA	NA
10D19	Turure	High	81.13	1.887	1.654	8.118	153.075	NA	NA	NA
10D20	Turure	High	82.832	1.482	0.528	15.778	82.32	NA	NA	NA
10D21	Turure	High	68.987	3.389	0.616	8.748	138.825	NA	NA	NA
10D22	Turure	High	61.86	3.619	0.614	11.876	114.1	NA	NA	NA
10D23	Turure	High	57.987	0	0.093	9.116	81.93333333	NA	NA	NA
10D24	Turure	High	63.62	2.723	0.337	8.92	104.2	4.416	3.1325	47.143
10D25	Turure	High	64.48	1.162	0.518	7.184	82.1	4.3565	3.395	46.9975
10D26	Turure	High	69.751	0.272	1.28	10.894	110.2	NA	NA	NA
10D27	Turure	High	68.518	0.615	0.416	6.766	110.46	NA	NA	NA
10D28	Turure	High	75.316	0.382	1.255	9.33	92.93333333	4.481	3.1475	48.022
10D29	Turure	High	63.708	1.13	0.202	7.497	54.5	4.418	3.263	46.8785
10D30	Turure	High	73.203	4.391	0.609	9.913	121	4.47	3.0825	48.313
10U1	Turure	Low	72.046	2.638	0.744	7.903	108.6333333	4.407	4.061	48.424
10U2	Turure	Low	94.055	8.112	2.21	16.134	136.075	NA	NA	NA
10U3	Turure	Low	75.435	8.528	1.663	9.728	NA	4.274	3.3805	47.2995
10U4	Turure	Low	66.41	5.208	1.558	6.319	NA	4.18	3.217	45.651
10U5	Turure	Low	76.393	13.859	1.77	12.953	113.8	4.2315	3.142	46.5315
10U6	Turure	Low	97.257	1.869	0.896	15.832	104.24	4.3255	3.1195	47.66
10U7	Turure	Low	67.192	1.848	0.902	8.907	130.42	NA	NA	NA
10U8	Turure	Low	67.054	9.648	1.041	10.031	129.38	NA	NA	NA
10U9	Turure	Low	68.031	8.157	0.67	8.541	104.425	NA	NA	NA
10U10	Turure	Low	75.667	3.473	0.768	13.325	80.3	NA	NA	NA
10U11	Turure	Low	69.925	1.499	0.369	5.779	134.875	NA	NA	NA
10U12	Turure	Low	77.78	5.577	1.6	14.507	131.3	NA	NA	NA
10U13	Turure	Low	68.297	2.606	0.64	7.198	97.575	NA	NA	NA
10U14	Turure	Low	82.226	2.096	0.431	8.789	113.275	NA	NA	NA
10U15	Turure	Low	74.474	9.973	1.532	12.848	118.225	NA	NA	NA
10U16	Turure	Low	69.916	6.8	0.412	9.089	104.4333333	NA	NA	NA
10U17	Turure	Low	63.563	5.599	0.61	6.777	108.5	NA	NA	NA
10U18	Turure	Low	63.772	0.774	1.111	7.167	60.3	NA	NA	NA
10U19	Turure	Low	68.29	2.514	1.11	10.814	82.3	NA	NA	NA
10U20	Turure	Low	77.441	2.318	1.003	9.915	130.4333333	NA	NA	NA
10U21	Turure	Low	78.258	5.405	2.102	9.065	118.85	NA	NA	NA
10U22	Turure	Low	74.415	2.496	1.343	9.533	112.15	NA	NA	NA
10U23	Turure	Low	81.37	1.84	2.423	13.124	102.2	NA	NA	NA
10U24	Turure	Low	67.662	4.331	0.363	7.62	98.88	NA	NA	NA
10U25	Turure	Low	74.06	10.594	1.407	7.955	65.875	NA	NA	NA
10U26	Turure	Low	73.653	3.324	0.901	13.306	97.62	NA	NA	NA
10U27	Turure	Low	83.606	14.848	1.565	10.056	94.025	NA	NA	NA
10U28	Turure	Low	81.487	7.154	1.56	9.23	97.5	NA	NA	NA
10U29	Turure	Low	76.384	4.804	1.603	7.698	NA	NA	NA	NA
10U30	Turure	Low	81.496	9.597	0.39	10.682	121.44	NA	NA	NA
12D1	St Joseph	High	66.833	3.067	0.83	6.798	47.96666667	4.525	2.994	44.766
12D2	St Joseph	High	74.414	5.947	0.954	12.951	117.6	NA	NA	NA
12D3	St Joseph	High	77.155	5.539	0.887	9.778	139.15	NA	NA	NA
12D4	St Joseph	High	75.228	4.909	1.457	12.636	74.4	4.4005	3.2905	46.11
12D5	St Joseph	High	67.203	7.565	0.43	9.518	93.06666667	4.568	2.7745	45.5535
12D6	St Joseph	High	59.567	0.418	0.563	6.691	150.15	NA	NA	NA
12D7	St Joseph	High	70.097	5.935	0.173	9.646	138.525	4.4975	2.828	46.7945
12D8	St Joseph	High	73.562	6.808	0.954	11.161	49.15	NA	NA	NA
12D9	St Joseph	High	103.302	16.098	2.08	11.74	105.225	4.4455	3.4465	46.586
12D10	St Joseph	High	84.487	7.536	0.568	11.834	102.975	4.5035	2.9265	46.4
12D11	St Joseph	High	67.477	1.897	1.051	5.289	133.38	4.4405	3.1395	45.9815
12D12	St Joseph	High	82.567	7.348	0.623	14.988	99.04	NA	NA	NA
12D13	St Joseph	High	100.73	3.713	1.818	14.79	116.6666667	4.4125	3.194	45.8495
12D14	St Joseph	High	75.124	8.017	1.668	5.9	95.25	4.4835	3.1515	45.9165
12D15	St Joseph	High	65.963	6.556	0.139	8.155	147.0333333	4.378	3.135	45.9585
12D16	St Joseph	High	92.038	11.724	0.589	14.983	100.15	NA	NA	NA
12D17	St Joseph	High	64.518	4.302	0.298	6.308	46.06666667	4.5	2.957	45.553
12D18	St Joseph	High	69.942	4.65	0.267	8.407	115.05	4.393	3.0325	45.0295
12D19	St Joseph	High	81.777	8.487	1.727	7.072	NA	4.3285	3.231	44.4455
12D20	St Joseph	High	77.607	4.693	1.087	6.824	NA	NA	NA	NA
12D21	St Joseph	High	65.33	1.89	0.76	8.692	63.26666667	NA	NA	NA
12D22	St Joseph	High	NA	NA	NA	NA	82.66666667	NA	NA	NA
12D23	St Joseph	High	65.42	9.443	1.214	15.268	112.56	4.501	2.901	46.3175
12D24	St Joseph	High	49.713	1.642	1.163	4.709	102.22	NA	NA	NA
12D25	St Joseph	High	85.717	5.105	0.485	13.408	105.3666667	NA	NA	NA
12D26	St Joseph	High	75.344	2.777	2.238	8.236	58.23333333	NA	NA	NA
12D27	St Joseph	High	104.928	6.606	1.737	22.392	127.6	NA	NA	NA
12D28	St Joseph	High	57.812	4.032	0.729	6.752	NA	4.5185	2.9475	46.789
12D29	St Joseph	High	63.096	5.035	1.629	7.892	96.45	NA	NA	NA
12D30	St Joseph	High	57.832	4.52	0.578	7.196	134.4	NA	NA	NA
12U1	St Joseph	Low	78.716	6.033	1.011	9.953	102.85	4.468	2.8395	46.745
12U2	St Joseph	Low	79.226	6.829	0.522	8.032	74.65	4.5415	3.009	47.3255
12U3	St Joseph	Low	62.242	3.984	1.025	3.637	51.4	4.4375	2.911	47.242
12U4	St Joseph	Low	50.862	2.742	0.318	4.835	NA	4.461	3.83	45.4495
12U5	St Joseph	Low	68.624	5.176	2.579	7.618	85.325	4.5225	3.159	47.22
12U6	St Joseph	Low	68.894	5.209	0.72	7.767	81.66666667	4.4725	3.104	47.476
12U7	St Joseph	Low	68.142	3.844	0.477	4.254	80.125	4.524	2.767	47.1035
12U8	St Joseph	Low	71.762	6.905	1.167	9.666	59.5	4.4325	3.154	47.7805
12U9	St Joseph	Low	61.276	3.824	1.233	7.619	85	4.498	3.1075	47.6345
12U10	St Joseph	Low	72.483	7.294	0.453	7.355	62.16666667	4.501	2.863	46.798
12U11	St Joseph	Low	85.831	15.412	1.499	10.285	144.7	NA	NA	NA
12U12	St Joseph	Low	56.608	3.3	1.019	7.915	NA	NA	NA	NA
12U13	St Joseph	Low	66	5.435	1.815	8.297	97.03333333	NA	NA	NA
12U14	St Joseph	Low	63.381	6.499	1.935	7.964	89.825	NA	NA	NA
12U15	St Joseph	Low	81.583	5.15	0.425	11.177	NA	4.3185	3.244	47.117
12U16	St Joseph	Low	75.627	4.257	2.39	11.02	96.88	NA	NA	NA
12U17	St Joseph	Low	68.654	2.638	1.094	9.233	93.43333333	NA	NA	NA
12U18	St Joseph	Low	49.905	3.088	0	4.906	NA	NA	NA	NA
12U19	St Joseph	Low	78.386	6.993	2.011	9.266	71.6	NA	NA	NA
12U20	St Joseph	Low	66.858	3.274	0.437	9.493	138.65	4.3525	3.173	47.0455
12U21	St Joseph	Low	63.568	6.202	1.165	8.836	77.95	NA	NA	NA
12U22	St Joseph	Low	79.16	6.493	1.987	8.351	96.7	4.462	2.9225	47.0875
12U23	St Joseph	Low	64.576	5.417	0.503	5.977	68.375	4.492	3.0805	46.7575
12U24	St Joseph	Low	70.159	11.555	1.963	8.724	64.95	4.581	2.595	48.2335
12U25	St Joseph	Low	70.792	2.853	1.536	12.125	120.175	4.461	2.9895	46.691
12U26	St Joseph	Low	84.49	11.87	1.242	14.104	NA	NA	NA	NA
12U27	St Joseph	Low	67.922	3.729	1.203	10.664	NA	NA	NA	NA
12U28	St Joseph	Low	79.102	5.995	2.809	10.345	103.95	4.4105	3.4025	46.3375
12U29	St Joseph	Low	64.361	7.035	2.387	8.115	85.48	NA	NA	NA
12U30	St Joseph	Low	72.622	10.042	3.021	8.489	105.3	NA	NA	NA
